# Supplementary material for: The pathogenesis of transmembrane activator, calcium modulator and cyclophilin ligand interactor (TACI) in primary Sjogren's syndrome and its intricate regulation of B cells
Source: Research Square preprint supplement (doi:10.21203/rs.3.rs-7960707/v1), 2025-12-15
Supplement: Supplementary file 1 [file f18a9d765ebb56145dc276b1.docx]

Table S1. Correlation analysis between TACI and miRNA relative expression

| Spearman ρ (*P)* | tTACI | | | sTACI |
| --- | --- | --- | --- | --- |
| TACI+B cell proportion | TACI+Breg proportion | TACI+memory B cell proportion |
| hsa-miR-144-3p | -0.008 (0.965) | -0.076 (0.667) | -0.036 (0.885) | -0.077 (0.734) |
| hsa-miR-144-5p | -0.101 (0.577) | -0.088 (0.626) | -0.122 (0.500) | -0.042 (0.852) |
| hsa-miR-4485-3p | -0.043 (0.816) | -0.169 (0.355) | -0.125 (0.494) | -0.083 (0.713) |
| hsa-miR-451a | -0.093 (0.606) | -0.216 (0.228) | -0.214 (0.233) | -0.129 (0.568) |
| hsa-miR-30b-5p | 0.303 (0.060) | 0.205 (0.211) | 0.420 (0.008) | -0.348 (0.113) |
| hsa-miR-26a-5p | 0.161 (0.335) | 0.100 (0.550) | 0.189 (0.257) | -0.518 (0.016) |
